1 *Transmission distortion and genetic incompatibilities between alleles in a*  
2 *multigenerational mouse advanced intercross line*

---

3 **Danny Arends**, danny.arends@hu-berlin.de, Albrecht Daniel Thaer-Institut für Agrar- und  
4 Gartenbauwissenschaften, Humboldt-Universität zu Berlin, Invalidenstraße 42, D-10115 Berlin,  
5 Germany

6 **Stefan Kärst**, stefan.kaerst@outlook.com, Albrecht Daniel Thaer-Institut für Agrar- und  
7 Gartenbauwissenschaften, Humboldt-Universität zu Berlin, Invalidenstraße 42, D-10115 Berlin,  
8 Germany

9 **Sebastian Heise**, SebastianHeise81@gmx.de, Albrecht Daniel Thaer-Institut für Agrar- und  
10 Gartenbauwissenschaften, Humboldt-Universität zu Berlin, Invalidenstraße 42, D-10115 Berlin,  
11 Germany

12 **Paula Korkuc**, paula.korkuc@hu-berlin.de, Albrecht Daniel Thaer-Institut für Agrar- und  
13 Gartenbauwissenschaften, Humboldt-Universität zu Berlin, Invalidenstraße 42, D-10115 Berlin,  
14 Germany

15 **Deike Hesse**, deike.hesse-wilting@hu-berlin.de, Albrecht Daniel Thaer-Institut für Agrar- und  
16 Gartenbauwissenschaften, Humboldt-Universität zu Berlin, Invalidenstraße 42, D-10115 Berlin,  
17 Germany

18 **Gudrun A. Brockmann**<sup>†</sup>, gudrun.brockmann@hu-berlin.de, Albrecht Daniel Thaer-Institut für Agrar-  
19 und Gartenbauwissenschaften, Humboldt-Universität zu Berlin, Invalidenstraße 42, D-10115 Berlin,  
20 Germany

21 <sup>†</sup> To whom correspondence should be addressed.

22 *Address for correspondence*

23 Gudrun A. Brockmann

24 Phone: 0049 30 2093 6089

25 Fax: 0049 30 2093 6397

26 E-mail: [gudrun.brockmann@agrar.hu-berlin.de](mailto:gudrun.brockmann@agrar.hu-berlin.de)

27 *Running title:* TRD in mouse advanced intercross line

28 *Keywords:* Intergenerational effects, Non-Mendelian inheritance, Genetic incompatibilities,

29 Interactions, Allele Transmission Bias

## 30 **Abstract**

### 31 **Background/Objectives**

32 While direct additive and dominance effects on complex traits have been mapped repeatedly,  
33 additional genetic factors contributing to the heterogeneity of complex traits have been scarcely  
34 investigated. To assess genetic background effects, we investigated transmission ratio distortions  
35 (TRDs) of alleles from parent to offspring using an advanced intercross line (AIL) of an initial cross  
36 between the mouse inbred strains C57BL/6NCrI (B6N) and BFMI860-12 (BFMI).

### 37 **Subjects/Methods**

38 341 males of generation 28 and their respective 61 parents and 66 grandparents were genotyped  
39 using Mega Mouse Universal Genotyping Arrays (MegaMUGA). TRDs were investigated using allele  
40 transmission asymmetry tests, and pathway overrepresentation analysis was performed. Sequencing  
41 data was used to test for overrepresentation of non-synonymous SNPs in TRD regions. Genetic  
42 incompatibilities were tested using the Bateson-Dobzhansky-Muller two-locus model.

### 43 **Results**

44 62 TRD regions were detected, many in close proximity to the telocentric centromere. TRD regions  
45 contained 44.5% more non-synonymous SNPs than randomly selected regions (182 vs.  $125.9 \pm 17.0$ ,  
46  $P < 1 \times 10^{-4}$ ). Testing for genetic incompatibilities between TRD regions identified 29 genome-wide  
47 significant incompatibilities between TRD regions ( $P_{(BF)} < 0.05$ ). Pathway overrepresentation analysis  
48 of genes in TRD regions showed that DNA methylation, epigenetic regulation of RNA, and  
49 meiotic/meiosis regulation pathways were affected independent of the parental origin of the TRD.  
50 Paternal BFMI TRD regions showed overrepresentation in the small interfering RNA (siRNA)  
51 biogenesis and in the metabolism of lipids and lipoproteins. Maternal B6N TRD regions harbored  
52 genes involved in meiotic recombination, cell death, and apoptosis pathways. The analysis of genes  
53 in TRD regions suggests the potential distortion of protein-protein interactions accounting for obesity  
54 and diabetic retinopathy as a result of disadvantageous combinations of allelic variants in *Aass*, *Pgx6*  
55 and *Nme8*.

## 56 **Conclusions**

57 Since genes in TRD regions showed a significant increase in the number of non-synonymous SNPs,  
58 these loci likely co-evolved to ensure protein-protein interaction compatibility, survival and optimal  
59 adaptation to the genetic background environment. Genes in these regions provide new targets for  
60 investigating genetic adaptation, protein-protein interactions, and determinants of complex traits  
61 such as obesity.

## 62 *Introduction*

63 Over the last two decades genome wide association studies (GWAS) have identified a virtual  
64 avalanche of genetic variants associated with complex phenotypes and diseases (Buniello et al.  
65 2019). However, although numerous, these identified genetic variations only partially explain the  
66 observed heritability in complex phenotypes either individually or combined (Zuk et al. 2012). This so  
67 called "missing heritability" problem has been observed for many complex phenotypes and diseases,  
68 such as obesity which has long been known to be a major risk factor for many diseases in the later  
69 course of life (Kopelman 2007; Tremmel et al. 2017). For obesity, as well as other complex  
70 phenotypes, a great amount of effort was spent finding genetic determinants (Speliotes et al. 2010;  
71 Willer et al. 2009). As a result, a large number of genetic variants contributing to obesity have been  
72 identified ([www.genome.gov/gwastudies](http://www.genome.gov/gwastudies)). However, most loci found by GWAS had small effects  
73 (Willer et al. 2009; Shungin et al. 2015). For example, the 97 significant loci identified for body mass  
74 index (BMI), accounted for only 2.7% of the corresponding variation (Locke et al. 2015).

75 One of several reasons discussed for the "missing heritability" problem in GWAS is the genetic  
76 heterogeneity of loci contributing to complex traits among the individuals in populations (Shungin et  
77 al. 2015; Heid et al. 2010). In addition to direct genetic effects, substantial phenotypic variation  
78 among individuals can be caused by preferential allele combinations or by allele incompatibilities in  
79 the genome of individuals. Allele incompatibilities are combinations of two (or more) alleles which

80 when inherited together cause a disadvantage for the individual. Inheriting the disadvantageous  
81 allele combination leads to a survival disadvantage for this individual (e.g. less vigor, less successful  
82 reproduction). Allelic interactions leading to such disadvantages can be detected as TRD from parent  
83 to offspring (also called allele transmission bias). Although TRD has been widely reported in a wide  
84 range of species (Huang et al. 2013b; Lyon 2003; Li et al. 2019), its functional impact on complex  
85 phenotypes has rarely been studied.

86 To investigate genetic background effects such as TRD, we examined three generations (26, 27, and  
87 28) of an advanced intercross line (AIL) between two inbred mouse lines, the Berlin Fat Mouse Inbred  
88 (BFMI) line and C57BL/6NCrl (B6N) line. In AIL populations from two inbred founders, only two  
89 parental alleles can segregate at each locus, making the population heterogeneous but less complex  
90 than human populations. Therefore, an AIL population is well suited to study deviations from  
91 Mendelian inheritance.

92 The BFMI is an inbred line generated from an outbred population descending from several different  
93 founder mice bought at pet shops across Berlin. The BFMI line had been selected for high fatness for  
94 more than 100 generations before it was inbred (Wagener et al. 2006). Unfortunately, the original  
95 founders of the BFMI do not exist anymore. However, whole genome DNA sequencing data showed  
96 that the BFMI genome is a mixture of *Mus musculus musculus* and *Mus musculus domesticus*.

97 Recently, a major recessive mutation responsible for the juvenile obesity phenotype (*jObes1*) in BFMI  
98 mice was fine-mapped to a 370 kb region on chromosome 3 (Arends et al. 2016). Complementation  
99 tests suggested *Bbs7* as the most likely causal gene in this region. The *jObes1* locus accounted for  
100 around 40% of the body weight variance (Neuschl et al. 2010; Arends et al. 2016), while  
101 environmental effects accounted for 34%. Hence, around 26% of the variance in body weight is still  
102 unexplained.

103 During the process of long-term selection for a phenotype (e.g. high fatness), enrichment or even  
104 fixation of alleles that positively contributed to the selection response have been observed (Hirsch et

105 al. 2014). Complimentary, the frequency of conflicting alleles impairing fitness, survival of gametes or  
106 embryos would be **expected** to be reduced or lost in the process of selection. In particular in complex  
107 traits, such as obesity, where many genes with diverse allelic variants contribute to the phenotype,  
108 the compatibility of interacting **alleles** is expected to be a driving force for the selection response.  
109 Therefore, long-term selection can be considered as co-evolution of alleles during the process of  
110 adaptation to selection pressure, environment, and genetic background.

111 The same principles of shaping the genomic composition occurred during the inbreeding history of  
112 every inbred mouse line, including BFMI and B6N, which were used in our experiment. Experimental  
113 inbreeding usually starts with several full sib families (Flurkey et al. 2009). During the process of  
114 repeated mating of full-sibs, when the genome gets more and more reduced to one haplotype, some  
115 inbred families go extinct because of direct lethal recessive allele effects, lethal combinations of  
116 alleles across the genome, or the inbred family collapses because of low vigor or insufficient  
117 reproduction (Whitlock 2000; Fitzpatrick and Evans 2009; Zajitschek et al. 2009) eventually as a **result**  
118 **of genomic incompatibility. However, low level incompatibilities, which do not directly cause lethality**  
119 **or affect fertility might be retained, invisible, inside an inbred line. During the inbreeding process**  
120 **haplotypes get reduced, and incompatibilities might survive since there is no choice of alternative**  
121 **allele anymore.** In the end, a kind of optimized genome remains alive as established inbred strain.

## 122 **Results**

### 123 *Allele transmission ratios from heterozygous parents to offspring*

124 The probability for the transmission of parental alleles to their offspring can be calculated according  
125 to Mendelian laws. Deviations from those expected inheritance patterns might have genetic reasons  
126 that we intend to identify. To test for TRDs, we used all 341 males of generation 28 of the AIL and  
127 tested how their parents (generation 27) transmitted their alleles to this generation. TRD was  
128 detected for 62 genomic regions at a genome-wide Bonferroni corrected significance level of 0.01.  
129 These regions can be grouped by the preferentially transmitted allele based on the parental origin  
130 (paternal / maternal) and the founder strain origin (B6N / BFMI). Significant paternal allele TRD was  
131 detected for 1,068 out of 18,114 tested SNPs. Paternally affected TRD of SNPs clustered into 31  
132 chromosomal regions, due to linkage between neighboring SNPs. For maternal TRD, 1,138 SNPs  
133 located in 31 regions were found (Supplemental\_Table\_S1). Overlaying the paternal and maternal  
134 TRD regions showed that 14 regions showed both paternal and maternal TRD. In overlapping TRD  
135 regions always the same founder allele of either mouse strain B6N or BFMI was preferentially  
136 transmitted.

137 TRD was detected consistently across large genomic regions, in which a high number of markers  
138 showed the same transmission bias for one of the two founder alleles B6N or BFMI. The 19 regions  
139 showing TRD supported by at least 50 markers are shown in Table 1, all detected TRD regions and  
140 their observed transmission distortions are summarized in Supplemental\_Table\_S1, and visualized in  
141 Figure 1. Genotypes, genetic map, and pedigree of the AIL individuals can be found in  
142 Supplemental\_Table\_S2

143 As an example, Pat\_R3 is a region on chromosome 4 from 3.5 to 12.5 Mb, which showed paternal  
144 TRD of the BFMI allele supported by 83 markers. In the AIL population, we observed at each marker  
145 around 217 paternal allele transmissions from generation 27 to 28, meaning we expect 108.5  
146 transmissions of the BFMI, as well as 108.5 transmissions of the B6N allele. However, in this region

147 markers on average showed 168 (+/- 5.0) transmissions of the BFMI allele from heterozygous fathers  
148 to their offspring, while the B6N allele was only transmitted 55.3 (+/- 3.9) times. At the top marker in  
149 this region on chromosome 4 (UNC6664886), we observed 169 BFMI versus 48 B6N transmissions.  
150 This means that transmission of the BFMI allele was observed 55.8 % more often than expected by  
151 Mendelian inheritance, the likelihood of this happening was estimated by  $\chi^2$ -test to be lower than  
152  $1 \times 10^{-14}$ .

153 When performing the same tests for the allele transmission from AIL generation 26 to 27  
154 (transmission from grandparents (n = 66) to parents (n = 61)), where sample sizes were much  
155 smaller, we relaxed our threshold for significance to  $p < 0.05$ . In generation 26 to 27, 0 and 38 SNPs  
156 still showed significant paternal or maternal TRD, respectively. The overlap between SNPs detected  
157 in generations 26 to 27 versus 27 to 28 was 100%, meaning that all TRD seen from generation 26 to  
158 27 was also found (much more significant) from generations 27 to 28.



159 **Table 1: Transmission ratio distortion from paternal and maternal side, supported by at least 50 SNPs ( $p < 0.01$ ) per identified region.** Region ID = the identifier of the region Pat\_R# stands for  
 160 paternal transmission ratio distortion and Mat\_R# stands for maternal transmission ratio distortion within the region, Chr = Chromosome on which the distortion was detected. Proximal, Top, and  
 161 Distal = start, top, and end positions of the region on the chromosome (based on the GRCh38.p6 / mm10 genome), preferred allele = the allele preferentially transmitted, nSNPs = number of SNP  
 162 markers on the array that support the TRD region, average transmission counts for founder alleles across all markers in the region are listed with their standard deviation in brackets. Top marker  
 163 as well as transmission at the top marker and BFMI allele % distortion is shown in the last 4 columns. See **Supplemental\_Table\_S1** for an overview of all 31 paternal and 31 maternal regions. The  
 164 observed very small standard deviations in almost all regions indicates that the distortion observed is consistent across the regions identified.

| RegionID | Chr | Proximal    | Top         | Distal      | RegionSize | nSNPs | Prefered Allele | Transmissions regionaverage (SD) |              | Topmarker          | Transmission Topmarker |     | BFMIallele %distortion |
|----------|-----|-------------|-------------|-------------|------------|-------|-----------------|----------------------------------|--------------|--------------------|------------------------|-----|------------------------|
|          |     |             |             |             |            |       |                 | BFMI                             | B6N          |                    | BFMI                   | B6N |                        |
| Pat_R1   | 1   | 3,668,628   | 11,643,615  | 14,698,538  | 11,029,910 | 68    | BFMI            | 146.1 (16.3)                     | 41.1 (6.6)   | UNC109624          | 152                    | 30  | 67.0                   |
| Pat_R3   | 4   | 3,569,913   | 6,093,982   | 12,555,306  | 8,985,393  | 83    | BFMI            | 168.0 (5.0)                      | 55.3 (3.9)   | UNC6664886         | 169                    | 48  | 55.8                   |
| Pat_R7   | 4   | 76,193,199  | 78,074,351  | 81,245,565  | 5,052,366  | 58    | BFMI            | 79.6 (9.0)                       | 15.8 (3.0)   | UNC7556251         | 84                     | 15  | 69.7                   |
| Pat_R17  | 12  | 5,253,913   | 8,416,509   | 12,177,986  | 6,924,073  | 92    | BFMI            | 163.3 (28)                       | 53.5 (9.6)   | UNC20594325        | 207                    | 47  | 63.0                   |
| Pat_R21  | 16  | 5,617,528   | 14,151,479  | 14,151,479  | 8,533,951  | 93    | B6N             | 31.5 (7.2)                       | 147.9 (15.1) | UNC26373573        | 35                     | 177 | -67.0                  |
| Pat_R22  | 17  | 3,264,958   | 5,991,544   | 11,318,508  | 8,053,550  | 77    | B6N             | 34.0 (16.2)                      | 99.4 (27.1)  | UNC170286629       | 16                     | 139 | -79.4                  |
| Pat_R23  | 17  | 47,490,686  | 48,644,966  | 50,134,302  | 2,643,616  | 50    | B6N             | 41.7 (30.8)                      | 117.1 (10.1) | UNC27963988        | 19                     | 110 | -70.5                  |
| Pat_R24  | 18  | 4,516,519   | 12,242,865  | 13,902,153  | 9,385,634  | 71    | BFMI            | 158.7 (2.9)                      | 61.4 (3.3)   | UNC28742422        | 155                    | 56  | 46.9                   |
| Pat_R25  | 18  | 38,281,545  | 38,975,190  | 42,987,483  | 4,705,938  | 54    | BFMI            | 168.7 (4.1)                      | 54.2 (9.3)   | UNC29080241        | 168                    | 46  | 57.0                   |
| Mat_R1   | 1   | 3,668,628   | 3,668,628   | 21,099,704  | 17,431,076 | 94    | BFMI            | 136.2 (17.8)                     | 56.9 (10.3)  | UNC010515443       | 178                    | 69  | 44.1                   |
| Mat_R2   | 3   | 6,274,425   | 11,119,314  | 17,230,305  | 10,955,880 | 53    | B6N             | 24.9 (13.5)                      | 129.2 (5.8)  | backupUNC030002827 | 13                     | 126 | -81.3                  |
| Mat_R5   | 3   | 133,540,430 | 136,529,917 | 137,921,098 | 4,380,668  | 52    | B6N             | 35.4 (4.1)                       | 105.3 (12.8) | UNC6326383         | 33                     | 113 | -54.8                  |
| Mat_R6   | 4   | 3,569,913   | 3,918,966   | 12,555,306  | 8,985,393  | 83    | BFMI            | 144.5 (5.5)                      | 50.1 (6.4)   | UNC6640040         | 135                    | 38  | 56.1                   |
| Mat_R12  | 6   | 48,276,599  | 48,276,599  | 53,750,577  | 5,473,978  | 53    | B6N             | 24.8 (5.0)                       | 80.5 (15.4)  | UNC11030573        | 27                     | 96  | -56.1                  |
| Mat_R15  | 9   | 67,022,716  | 74,576,994  | 75,773,843  | 8,751,127  | 54    | B6N             | 37.3 (12.9)                      | 110.8 (16.1) | UNC090145124       | 23                     | 99  | -62.3                  |
| Mat_R16  | 9   | 106,017,492 | 106,605,721 | 107,516,430 | 1,498,938  | 58    | B6N             | 29.3 (4.5)                       | 87.1 (2.4)   | UNC17077906        | 27                     | 87  | -52.6                  |
| Mat_R23  | 16  | 5,617,528   | 5,617,528   | 18,450,764  | 12,833,236 | 163   | B6N             | 23.5 (8.7)                       | 108.4 (11.2) | UNC160000883       | 10                     | 130 | -85.7                  |
| Mat_R25  | 17  | 3,264,958   | 5,991,544   | 11,318,508  | 8,053,550  | 77    | B6N             | 20.0 (4.4)                       | 106.8 (22.4) | UNC170286629       | 20                     | 164 | -78.3                  |
| Mat_R28  | 18  | 4,516,519   | 8,317,246   | 15,000,978  | 10,484,459 | 81    | BFMI            | 170.6 (19.5)                     | 52.0 (2.8)   | UNC28690832        | 50                     | 197 | -59.5                  |

165

166 In our population, we observed that the TRD is a local event affecting many SNPs in a well-defined  
167 chromosomal region due to linkage between neighboring SNPs. Since, many recombinations have  
168 accumulated over 28 generations of mating, the length of the TRD affected regions is between 41.1  
169 kb and 17.4 Mb (Supplemental\_Table\_1). In these regions, SNPs that showed TRD are tightly linked  
170 (Figure 1), which can be seen by TRD SNPs clustering together into regions. Very small standard  
171 deviations of averaged TRD transmissions (Table 1) were observed for all regions, which indicates  
172 that distortion observed was consistent across the TRD region. This was further supported by the  
173 observation that all SNPs in a certain region always showed the same direction of transmission  
174 towards one of the alleles from the original founder strains of the AIL population. For example,  
175 Mat\_R1 showed the BFMI allele was preferentially transmitted in the maternally distorted region on  
176 chromosome 1 between 3.7 and 21.1 Mb. For the 94 markers in this region, we observed 136.2 +/-  
177 17.8 transmissions of the BFMI allele versus 56.9 +/- 10.3 transmissions of the B6N allele from  
178 mother generation 27 to offspring (generation 28).

179 Interestingly, regions showing significant TRD on 10 out of 19 autosomes (autosomes 1, 3, 4, 5, 10,  
180 12, 14, 16, 17, 18) are located close to the telocentric centromere (Figure 1). These 10 telocentric  
181 centromere regions showed both paternal and maternal TRD with a consistent preference of the  
182 founder allele. While these telocentric centromere regions showed TRD for both paternal and  
183 maternal alleles, we observed that non-telocentric centromere regions (e.g. Mat\_R12, Table 1) tend  
184 to show TRD only when inherited from either the paternal or the maternal side.

185 *Genetic variants in TRD regions*

186 To identify candidate genes for each region, and to investigate possible causes for the observed TRD,  
187 protein coding genes located in TRD regions were examined. Sequence variants were detected by  
188 comparing the BFMI sequence to the B6N reference genome (ENSEMBL, GRCm38.p6)  
189 (Supplemental\_Table\_S3). In the 62 identified TRD regions, 1,167 unique protein coding genes were  
190 located. In detail, these were 292 genes in Pat\_BFMI regions, 362 in Mat\_BFMI, 335 in Pat\_B6N, and  
191 567 in Mat\_B6N. Among those, 389 genes were overlapping between paternal and maternal TRD  
192 regions.

193 In the 1,167 unique protein coding genes located in 62 TRD regions, 182 non-synonymous SNPs  
194 (nsSNPs) were found located in 128 (10.9%) genes. Permutation analysis showed that the density of  
195 nsSNPs in the TRD regions was 1.445 times higher than expected from random distribution. Results  
196 from 50,000 permutations showed an average of  $125.9 \pm 17.0$  (SD) nsSNPs per 1,167 randomly  
197 selected genes with a maximum value of 180 SNPs observed during permutation. These results  
198 provide evidence that nsSNPs are significantly overrepresented in TRD regions ( $P < 1 \times 10^{-4}$ ).

199 **Figure 1: Genomic regions showing allele transmission ratio distortion towards generation 28.** Bars left of the  
 200 chromosomes mark the SNPs which show paternal TRD ( $\sigma$ ); bars on the right side show maternal TRD ( $\rho$ ), using a genome  
 201 wide significance level of  $P < 0.01$ . Colors show the origin of the allele preferentially transmitted, blue: B6N allele, orange:  
 202 BFMI allele. Chromosomal black areas (suitable markers) contain markers which passed quality control steps, segregate  
 203 between the founder lines (BFMI and B6N), and have at least ten heterozygous parents in generation 27 required to perform  
 204 a valid  $\chi^2$  test. Chromosomal beige areas (Founders equal) are markers at which the BFMI and B6N have the same allele,  
 205 these markers do not segregate in the AIL population, and cannot be tested for TRD. Chromosomal gray areas (unsuitable  
 206 markers) have not been tested due to lack of heterozygous parents in generation 27 at these markers. Chromosomal red  
 207 areas are not in Hardy-Weinberg equilibrium (HWE) in generation 28, since HWE is an assumption underlying a valid TRD  
 208 test, these areas were excluded from TRD analysis.

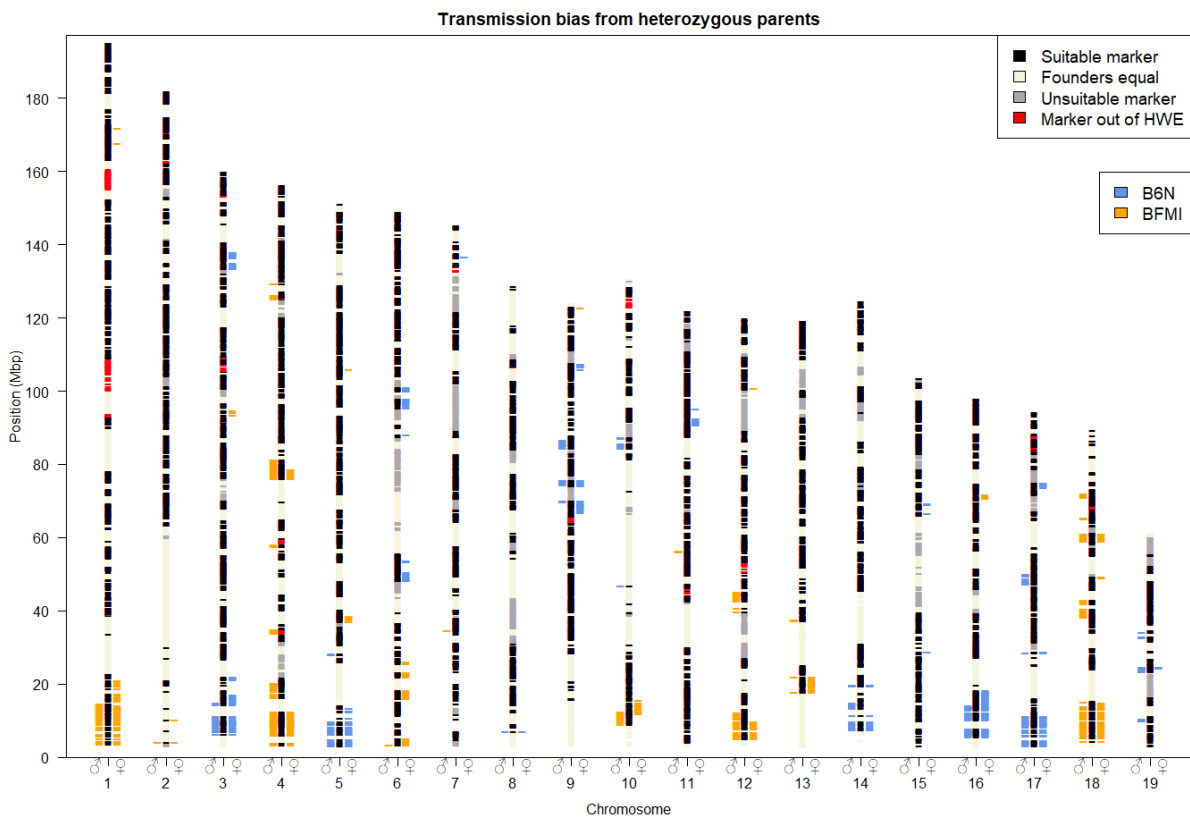

209

## 210 *Pathway overrepresentation analysis*

211 Pathways analysis was performed twice, once we investigated pathway overrepresentation by  
212 including all protein-coding genes in the specified TRD regions, followed by only investigating genes  
213 that carry nsSNPs.

214 Analysis of all genes in TRD regions with higher transmission of the paternal BFMI allele (Pat\_BFMI)  
215 showed slight but significant pathway overrepresentation of the three pathways “Post-  
216 transcriptional silencing by small RNAs” ( $P_{(BH)} = 0.008$ ), “Small interfering RNA (siRNA) biogenesis”  
217 ( $P_{(BH)} = 0.011$ ), and “MicroRNA (miRNA) biogenesis” ( $P_{(BH)} = 0.016$ ) ([Supplemental\\_Table\\_S4](#) -  
218 Pat\_BFMI for the full list).

219 All genes located in maternal inherited (Mat\_BFMI) showed highly significant overrepresentation for  
220 pathways such as “DNA methylation” ( $P_{(BH)} < 5.7 \times 10^{-16}$ ), “Meiotic Recombination” ( $P_{(BH)} < 6.61 \times 10^{-15}$ ),  
221 “Packaging Of Telomere Ends” ( $P_{(BH)} < 1.70 \times 10^{-13}$ ), “Chromatin organization” ( $P_{(BH)} < 2.66 \times 10^{-10}$ ) and  
222 “Deposition of new CENPA-containing nucleosomes at the centromere” ( $P_{(BH)} < 3.67 \times 10^{-10}$ )  
223 ([Supplemental\\_Table\\_S4](#) - Mat\_BFMI for the full list). All these pathways are involved in  
224 chromosome stability/maintenance as well as centromere and nucleosome organization. We also  
225 found strong overrepresentation of the “Signaling by Wnt” ( $P_{(BH)} = 1.09 \times 10^{-5}$ ) pathway, as well a weak  
226 overrepresentation of the “Retinol metabolism” ( $P_{(BH)} = 0.010$ ) pathway. These are two interesting  
227 pathways in the context of BFMI mice, which will be elaborated in more detail in the discussion  
228 section.

229 No strong overrepresentation or overlap was found for all genes located in paternal/maternal B6N  
230 TRD regions ([Supplemental\\_Table\\_S4](#) - Pat\_B6N & Mat\_B6N). Only three pathways were found  
231 weakly overrepresented when using all genes from maternal B6N (Mat\_B6N) TRD regions: “Nitrogen  
232 metabolism” ( $P_{(BH)} < 0.019$ ), “Reversible hydration of carbon dioxide” ( $P_{(BH)} < 0.033$ ), and “Osteoclast  
233 differentiation” ( $P_{(BH)} < 0.042$ ).

234 If we focused on genes with nsSNPs in TRD regions, where the BFMI allele is preferentially passed by  
235 the father ([Supplemental\\_Table\\_S4](#) - Pat\_BFMI\_SNP), no strong pathway overrepresentation was  
236 observed. Only two pathways reach significance after Benjamini-Hochberg correction: “S Phase”  
237 ( $P_{(BH)} = 0.015$ ) and “Extracellular matrix organization” ( $P_{(BH)} = 0.025$ ). However, the number of genes  
238 found in TRD regions (2 for both) versus the total number of genes annotated to these pathways  
239 make this overrepresentation very weak (117 and 216 respectively). If we examined the genes with  
240 nsSNPs from TRD regions of paternal B6N allele transmission ([Supplemental\\_Table\\_S4](#) -  
241 Pat\_B6N\_SNP), “Interferon Signaling” ( $P_{(BH)} = 0.016$ ), “Cell cycle” ( $P_{(BH)} = 0.023$ ), and “Metabolism of  
242 lipids and lipoproteins” ( $P_{(BH)} = 0.023$ ) were weakly significantly overrepresented. Again, the numbers  
243 of genes in TRD regions is small compared to the total number of genes annotated to these  
244 pathways.

245 Genes with nsSNPs from TRD regions of the maternal BFMI allele ([Supplemental\\_Table\\_S4](#) -  
246 MAT\_BFMI\_SNP) showed only one very weak significant pathway overrepresentation: “Extracellular  
247 matrix organization” ( $P_{(BH)} = 0.046$ ), which was also found for genes with nsSNPs in TRD regions  
248 where the BFMI allele was preferentially passed by the father (Pat\_BFMI\_SNP). Genes with nsSNPs in  
249 TRD regions of the maternal B6N allele ([Supplemental\\_Table\\_S4](#) - Mat\_B6N\_SNP) also showed  
250 overrepresentation of multiple pathways overlapping with pathways found for genes with nsSNPs in  
251 paternal B6N regions (“Cell cycle”, “Interferon Signaling”, “Metabolism”, and “Metabolism of lipids  
252 and lipoproteins”). Furthermore, maternal genes with nsSNPs in TRD regions contributed also to cell  
253 death and apoptosis (pathways “Cell death signalling via NRAGE, NRIF and NADE” ( $P_{(BH)} = 0.04$ ) and  
254 “p75 NTR receptor-mediated signaling” ( $P_{(BH)} = 0.049$ )).

## 255 *Genetic incompatibilities*

256 Since functional inaptitude of alleles of interacting pairs of genes could be causal for TRD, we  
257 searched for evidence of genetic incompatibilities by a pairwise search between all 62 TRD regions  
258 against each other using the Bateson-Dobzhansky-Muller model. This search identified genome-wide  
259 significant pairwise incompatibilities ( $P_{(BF)} < 0.05$ ) for 29 out of 62 TRD regions (Figure 2), of which 19  
260 were classified as highly significant ( $P_{(BF)} < 0.01$ ). The high number of TRD regions (46.8 %) showing  
261 evidence for one or more genetic incompatibilities suggests that genetic incompatibilities are an  
262 important contributor to TRD.

263 Analysis of protein-protein interactions between all 128 protein-coding genes with nsSNPs located in  
264 TRD regions showed 331 known interactions between the protein products of these genes. When we  
265 ignored genes located on the same chromosome (for which genetic incompatibility tests cannot be  
266 performed) we ended up with 273 known protein-protein interactions.

267 Within the 29 regions that showed genome-wide evidence ( $P_{(BF)} < 0.05$ ) for genetic incompatibilities,  
268 44 out of the 128 (34.4%) protein-coding genes with nsSNPs reside. In total, five known physical  
269 protein-protein interactions exist in the Search Tool for the Retrieval of Interacting Genes/Proteins  
270 (STRING) database between these 44 genes.

271 Within these known protein-protein interactions, we found an interaction between alpha-  
272 aminoadipic semialdehyde synthase (Aass) located in Mat\_R11 (6:16-26 M) with glutathione  
273 peroxidase 6 (Pgx6) as well as NME/NM23 Family Member 8 (Nme8) which are both located in  
274 Mat\_R20 (13:18-22 M). All three of these genes are interesting, given that all three genes are  
275 involved in obesity and/or diabetic retinopathy, which are the obvious phenotypic difference  
276 between the founders inbred strains BFMI and B6N. The Aass protein is involved in the major  
277 mitochondrial lysine degradation pathway (PAPES et al. 1999; Sacksteder et al. 2000) was found to  
278 be downregulated in obese compared with lean co-twins (Heinonen et al. 2015). With regard to  
279 Pgx6, glutathione peroxidase activity is suppressed in diabetic compared to healthy controls, with a

280 more pronounce suppression in obese compared to nonobese diabetics (Singhai et al. 2011).

281 Glutathione peroxidase activity was found associated with diabetic retinopathy (Rodríguez-Carrizalez

282 et al. 2014). *Nme8*, encodes an axoneme protein, and mutations in the *Nme8* gene have been

283 implicated to cause primary ciliary dyskinesia (Duriez et al. 2007). Furthermore, the genetic region in

284 which the *Nme8* gene is located was identified in human GWAS as a locus which might be involved in

285 childhood obesity in the Hispanic population (Comuzzie et al. 2012). *Nme8* is a very interesting gene

286 to come up during this analysis, because of its relation to primary ciliary dyskinesia. The *Bbs7* gene

287 was previously identified as the most likely causal gene for the obesity phenotype of the BFMI mouse

288 (Arends et al. 2016). The *Bbs7* protein is part of the BBSome complex which is a heterooctameric

289 protein complex that plays a central role in primary cilia homeostasis (Klink et al. 2020).

290 Furthermore, a protein-protein interaction between acyloxyacyl hydrolase (*Aoah*), located Mat\_R20

291 (13:18-22 M) and protein tyrosine phosphatase receptor type Z1 (*Ptprz1*) Mat\_R11 (6:16-26 M) was

292 found. *Aoah* is a lipase that plays an important role in the defense against gram-negative bacterial

293 infection (Lu et al. 2008). *Aoah*<sup>-/-</sup> mice on a high-carbohydrate diet develop non-alcoholic

294 steatohepatitis (NASH) and both serum triglyceride and cholesterol were found significantly

295 increased (Ojogun 2008). The *Ptprz1* gene is annotated to the insulin receptor recycling pathway, and

296 protein tyrosine phosphatases (PTPs) are required for the dephosphorylation of the insulin receptor

297 (Fischer et al. 1991). Again, both genes identified by our approach are clear candidate genes when

298 considering the major phenotypic differences of the founder strains BFMI and B6N.

299 The next identified protein-protein interaction between genes with nsSNPs in TRD regions showing

300 genetic incompatibilities was between myosin IE (*Myo1e*), located Mat\_R15 (9:67-76 M) and

301 serine/threonine kinase 32B (*Stk32b*) Mat\_R9 (5:37-39 M). *Myo1e* is part of the nonmuscle class I

302 myosins which are a subgroup of the unconventional myosin protein family and function as actin-

303 based molecular motor. The *Stk32b* gene is annotated into the “Sweet Taste Signaling” pathway

304 (GeneCards Human Gene Database 2021), and deletion of the gene was associated with Ellis-Van



305 Creveld Syndrome (Temtamy et al. 2008) in humans. This interaction doesn't have a clear link to the  
306 phenotypic differences between BFMI and B6N.

307 Moreover, protein-protein interaction was detected between myosin VC (Myo5c), located Mat\_R15  
308 (9:67-76 M) and solute carrier family 2 member 9 (Slc2a9) located in Mat\_R9 (5:37-39 M). The Myo5c  
309 protein is involved in actin-based membrane trafficking in many physiologically crucial tissues. In  
310 humans (and mice), Myo5c is particularly abundant in epithelial and glandular tissues such as:  
311 pancreas, prostate, mammary, stomach, colon, and lung (Rodriguez and Cheney 2002). *Myo5c*  
312 knockout mice show a decrease in total body fat amount and an increased lean body weight (Blake et  
313 al. 2021; Mouse Genome Database (MGD) 2021). It's interaction partner Slc2a9 is part of the SLC2A  
314 facilitative glucose transporter family. Members of this family play a role in maintaining glucose  
315 homeostasis. Slc2a9 does not transport glucose, but is classified as a urate transporter. Mutations in  
316 the *Slc2a9* gene have been shown to be causal for renal hypouricemia (Matsuo et al. 2008; Dinour et  
317 al. 2010), mice lacking the Slc2a9 protein show early onset metabolic syndrome (DeBosch et al.  
318 2014).

319 These known protein-protein interactions between genes in TRD regions with nsSNPs, lead us to  
320 hypothesize that disturbed protein-protein interactions resulting from amino acids changes due to  
321 nsSNPs within several proteins of a protein complex are likely one of the driving forces causing the  
322 TRD observed in the BFMIxB6N advanced intercross line.

323 **Figure 2: Significant genetic incompatibilities between regions showing TRD.** Heat map showing the pairwise genetic  
 324 incompatibility scan between TRD regions, genome-wide  $P_{(BF)} < 0.05$ . The allele combination (M1|M2) which is most reduced  
 325 (in percentages) between the observed and expected allele combinations are shown in the figure with colors denoting the  
 326 founder allele combination M1 (x-axis) and M2 (y-axis). Names of regions are composed of chr:start-end allele origin; start  
 327 and end positions are given in megabase pairs; furthermore, the TRD origin is coded by M for maternal and P for paternal.  
 328 When two regions were located on the same chromosome the genetic incompatibility test was not performed (gray areas),  
 329 since the pairwise genetic incompatibility test can only be performed on loci which are not in linkage.

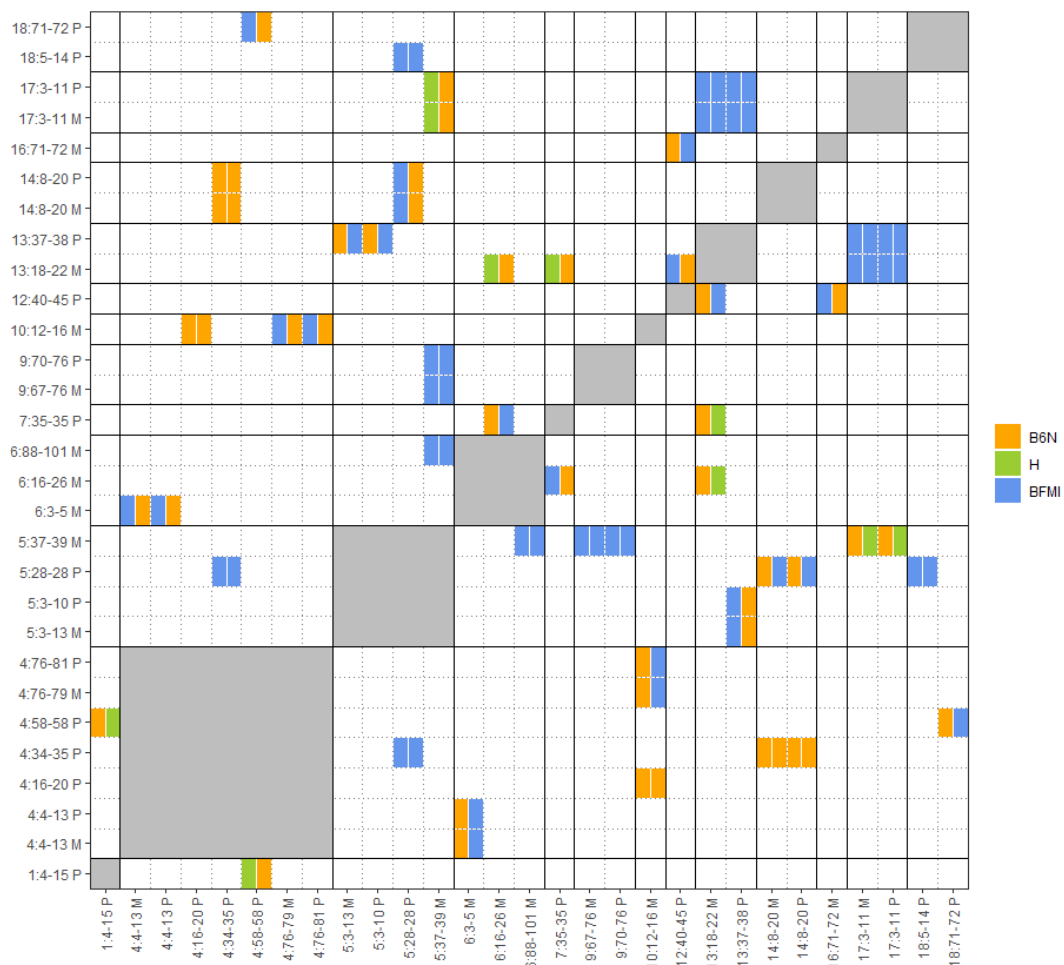

330

## 331 *Conclusions and discussion*

332 In this study, we examined an AIL population originating from a cross between the obese mouse line  
333 BFMI and the standard mouse line B6N in generations 26 to 28 for TRD from parents and  
334 grandparents to offspring. The most significant finding of this study was the detection of 62 genomic  
335 regions showing TRD in the genotype data from generations 27 to 28.

336 We considered three possible explanations for the widespread TRD we observe in our AIL, (1)  
337 independent selection at each locus, (2) gametic or meiotic drive, and (3) preferential selection of  
338 combinations of alleles at two or more loci.

339 The first hypothesis that selection happens at each locus independently will often lead to  
340 nonproductive crosses and/or massive lethality after birth (Huang et al. 2013a). The argument  
341 against this first hypothesis is that the litter size in generation 28 does not deviate from the litter size  
342 in the parental inbred lines BFMI and B6N (data not shown). When incompatibilities are  
343 (embryonically) lethal this would cause a side-effect of significant TRD which should also be  
344 detectable as deviation from the Hardy Weinberg equilibrium (HWE) in the offspring generation  
345 (Paterson et al. 2009). Since regions out of HWE were excluded in our study, (embryonically) lethal  
346 alleles were not investigated in our AIL. This means that the observed TRD cannot be due to lethality,  
347 leading us to reject this hypothesis of direct independent selection at each locus as the cause for the  
348 TRD observed in our AIL.

349 The second possible mechanism for the TRD observed in this paper are the well-investigated  
350 examples in mouse from meiotic drive, such as the *t*-complex (Safronova and Chubykin 2013). In  
351 short, meiotic drive can be thought of as a conflict in which a selfish allele is able to use asymmetric  
352 meiosis in order to have a greater chance of being transmitted to the gamete. This mechanism in first  
353 instance fits our observations well, since peri-centromeric regions seem to be involved. Detected  
354 TRD regions in our AIL were observed located in close proximity to the telocentric centromere for 10  
355 out of 19 autosomes. This observation is consistent with previous findings in e.g. *Drosophila*, where

356 autosomal **meiotic** drivers, occur in heterochromatic regions around centromere and telomere  
357 (Brand et al. 2015). In mice, **incompatibilities in and around the centromeric regions between *Mus***  
358 ***musculus musculus* and *Mus musculus domesticus* have been known for decades (Fel-Clair et al.**  
359 **1998; Lenormand et al. 1997) and have been studied extensively in mouse populations near the**  
360 **hybrid zone (Teeter et al. 2008; Larson et al. 2018). Centromere strength differs between mouse**  
361 **strains and was found to predict the direction of meiotic drive in mice (Chmátal et al. 2014). Earlier**  
362 **findings showed no incompatibility between the chromosome 11 centromere region in hybrids**  
363 **between *Mus musculus musculus* and *Mus musculus domesticus* (Lanneluc et al. 2004). Our study**  
364 **confirms this finding, since we also did not observe TRD at the chromosome 11 centromeric region.**  
365 **Genome-wide DNA sequencing showed that BFMI is a hybrid between *Mus musculus musculus* and**  
366 ***Mus musculus domesticus* (data not shown, sequencing data available at SRA). As such, the AIL**  
367 **between BFMI and B6N might have revived incompatibilities stemming from meiotic drive between**  
368 ***musculus* and *domesticus* alleles. However, an argument against meiotic drive causing our TRD is that**  
369 **true meiotic drive would have led to fixation of the favored allele / haplotype within 26 to 28**  
370 **generations (Kursel and Malik 2018). Since we do not observe this fixation, the meiotic drive**  
371 **hypothesis is unlikely to underly the widespread TRD observed in our AIL. Additionally, in mammals**  
372 **only female meiosis is asymmetric (Brunet and Verlhac 2011; Kursel and Malik 2018), meaning that**  
373 **our observed paternal TRD is most likely not due to meiotic drive. However, we cannot exclude that**  
374 **this hypothesis might play a role for the maternal TRD regions observed near the centromeric**  
375 **regions, and pathway overrepresentation analysis shows overrepresentation of pathways which**  
376 **point to meiotic drive in maternal BFMI TRD regions.**

377 **Our third and preferred hypothesis is that TRD at each locus is not independent but rather caused by**  
378 **selection on preferential combinations of alleles or selection against detrimental allele combinations**  
379 **(Martin-DeLeon et al. 2005; Xie et al. 2019). nsSNPs in protein-coding genes located in TRD regions**  
380 **were investigated to see if this hypothesis could explain the TRD observed. In total, we found **182****  
381 **nsSNPs in **128** genes within the **62** identified regions showing TRD. Based on permutation we would**

382 have expected to see only  $125.9 \pm 17.0$  nsSNPs. The density of nsSNPs in genes in TRD regions was  
383 44.5% higher than expected by chance. While the changes in amino acid sequence derived from  
384 nsSNPs in a single gene might not be sufficient to cause lethality or to reduce fitness, co-occurrence  
385 with SNPs in protein-protein interaction partners could cause such adverse effects, e.g. by affecting  
386 protein-protein binding leading to signaling problems (Xie et al. 2019). Such problems would result in  
387 detectable TRD over several generations. On evolutionary time scales this is known as protein co-  
388 evolution, known to leave detectable footprints (Clark et al. 2011; Teppa et al. 2017). We suggest this  
389 is what drives most TRD in our BFMI x B6N AIL, in which the evolutionary separated genomes of *Mus*  
390 *musculus musculus* and *Mus musculus domesticus* are combined leading to resurging  
391 incompatibilities between proteins coded in different TRD regions.

392 Pairwise testing of genetic incompatibilities between the 62 identified TRD regions showed 29  
393 genome-wide highly significant genetic incompatibilities in our AIL. Although our analysis shows that  
394 observed allele TRD is likely due to incompatibility between proteins in two or more TRD regions,  
395 genetic incompatibilities only account around half of TRD observed. Potentially, some  
396 incompatibilities could not be detected since (1) we limited our analyses to pairwise testing TRD  
397 regions, (2) incompatibilities might not always lead to detectable transmission ratio distortion, and  
398 (3) not all protein-protein interactions are known yet and/or stored in the STRING database.  
399 Furthermore, some genomic regions did not contain informative markers, and as such, they did not  
400 allow us to test for TRD in these regions. However, we cannot exclude meiotic drive for maternal TRD  
401 regions near the centromeres which might act alongside the genetic incompatibility hypothesis.

402 Pathways overrepresented in maternal BFMI TRD regions strongly point to meiotic drive with  
403 pathways such as: "DNA methylation", "meiotic/meiosis regulation", "Chromatin organization",  
404 "Nucleosome assembly", and "Telomere Maintenance" overrepresented. This is in line with the  
405 meiotic drive hypothesis being causal for some of the maternal TRD observed near the centromeres.

406 Paternal TRD regions showed overrepresentation of “Signaling by Wnt”, “Metabolism of lipids and  
407 lipoproteins”, and “Retinol metabolism”. These pathways point to incompatibilities, and genes  
408 located in TRD regions, such as acyl-CoA oxidase 2 (*Acox2*), fat binding proteins 4 and 5 (*Fabp4*,  
409 *Fabp5*), fatty acid desaturase 2 (*Fads2*) and malic enzyme 1 (*Me1*) which are known to be involved in  
410 energy partitioning and metabolism phenotypes in which the BFMI and B6N founders differ. Recent  
411 work on the retina of BFMI mice has shown differences in the rhodopsin layer of BFMI vs. B6N mice,  
412 pointing towards an impaired retina function in BFMI mice. Eyes of the BFMI showed definite  
413 characteristics of retinal degeneration in terms of a dysfunction of the rhodopsin transport and a  
414 reduction in the outer nuclear layer (ONL) thickness (Brockmann C. et al. 2017). This might explain  
415 why genes located in the “Retinol metabolism” pathway come up as significantly overrepresented.  
416 Our TRD analysis identifies genes within TRD regions that could be considered as possible candidate  
417 genes for retinal degeneration in mice and humans.

418 When looking into pathways that were overrepresented while analyzing TRD genes with nsSNPs,  
419 pathways such as “Cell Cycle”, “Metabolism of lipids and lipoproteins”, “Metabolism”, “Signaling by  
420 Rho GTPases” show in both paternal as well as maternal TRD regions. This provides support for the  
421 hypothesis that fundamental cell cycle and metabolic processes are affected by TRD and that  
422 selection of major phenotypic differences (e.g. body weight and fat composition) shaped the allelic  
423 composition of the genome of the founder inbred lines by different genetic requirements. These  
424 genetic adaptations are necessary for the optimization of the genome to ensure fitness and  
425 reproduction during the generation of inbred lines and might be what causes the observed TRD when  
426 founder genomes are combined together.

427 Our study sheds new light on the TRD in a cross between different inbred mouse strains, the distinct  
428 functioning of genomes in producing viable offspring, and provides a way to identify candidate genes  
429 which could contribute to complex traits different between the founder strains (in our case obesity  
430 and/or retinal functionality). The genes in the TRD regions provide new targets for investigating  
431 genetic adaptation and modifying determinants of complex traits.

## 432 *Materials and Methods*

### 433 *Mouse population*

434 348 male mice of an advanced intercross line (AIL) in generation 28 as well as their 62 parents and 66  
435 grandparents from generations 27 and 26 were genotyped. The AIL population originates from the  
436 mapping population of a cross between a male mouse of the obese line BFMI860-12 (BFMI) and a  
437 female of the lean line C57BL/6NCrJ (B6N), that had been initially used to map the juvenile obesity  
438 locus *jObes1* (Neuschl et al. 2010). Beginning in generation F<sub>1</sub>, individuals were randomly mated to  
439 mice from the same generation using the program RandoMate (Schmitt et al. 2009).

### 440 *Husbandry conditions*

441 All experimental treatments of animals were approved by the German Animal Welfare Authorities  
442 (approval no. G0016/11). All mice were maintained under conventional conditions and a 12:12 h  
443 light:dark cycle (lights on at 6:00 am) at a temperature of 22 ± 2 °C. Animals had *ad libitum* access to  
444 food and water. To perform fine mapping of the obesity QTL (Arends et al. 2016), generation 28 was  
445 fed with a rodent high fat diet (HFD) containing 19.5 MJ/kg of metabolizable energy, 45% from fat,  
446 24% from protein and 31% from carbohydrates (E15103-34, ssniff EF R/M, Ssniff Spezialdiäten GmbH,  
447 Soest / Germany). All other generations used in this study were fed a standard breeding diet (V1534-  
448 000, ssniff EF R/M; Ssniff Spezialdiäten GmbH, Soest, Germany).

### 449 *Genotypes*

450 Genotypes were generated at GeneSeek (Lincoln, NE, USA) using the Mega Mouse Universal  
451 Genotyping Array (MegaMUGA). These arrays are SNP genotyping arrays based on the Illumina  
452 Infinium platform designed by investigators at the University of North Carolina at Chapel Hill,  
453 manufactured by Illumina (San Diego, CA), and distributed by Neogen Inc (Lansing, MI, USA) (Morgan  
454 and Welsh 2015). This array contains probes targeting 77,800 known SNPs. SNP probes were  
455 remapped to the reference genome (GRCm38\_95) using BLASTN with default settings (Camacho et  
456 al. 2009). In order to increase the certainty of genotype calls, genotypes with a GenCall score greater

457 than 0.7 were considered confidently called, although the manufacturer's recommendation is a  
458 GenCall score > 0.15. SNPs that mapped to multiple positions in the genome, non-informative SNPs,  
459 and SNPs with genotype call rates below 90% were removed from further analysis. In total, 14,415  
460 highly confident SNPs passed all quality checks and were informative between BFMI and B6N. Marker  
461 density, as well as minor allele frequencies (MAF) within and outside of TRD regions were visualized  
462 and can be found in Supplemental\_Table\_S5

463 Furthermore, checking parent-child relations in our trio data identified 3 individuals in generation 28  
464 where one of the parents was wrongly assigned, these 3 individuals were removed from further  
465 analysis. Similarly, one individual in generation 27 was found to have a wrong parent assignment,  
466 leading to the removal of this individual and its 4 offspring in generation 28. Phasing of the  
467 heterozygous genotypes of the AIL animals of generation 28 towards the parental population  
468 (generation 27), and of generation 27 to generation 26 was done using Beagle v4.1 (Browning and  
469 Browning 2007) with standard settings. Raw and phased genotypes of all individuals that passed QC  
470 ( $N_{(28)} = 341$ ,  $N_{(27)} = 61$ , and  $N_{(26)} = 66$ ), the genetic map, and pedigree data are available in  
471 Supplemental\_Table\_S2.

#### 472 *Allele transmission from heterozygous parents*

473 Deviations from expected Mendelian inheritance ratios are named transmission ratio distortion  
474 (TRD). Such deviations have been commonly observed in experimental crosses as well as in natural  
475 populations. We used an extension of the transmission asymmetry test and parental asymmetry test  
476 to detect parent-of-origin dependent effects on the frequency of the transmission of a specific SNP  
477 allele from parent to offspring using trios in our AIL design (Weinberg et al. 1998). For example: To  
478 determine if one of the alternative paternal alleles (e.g. A versus B allele) at a SNP locus is inherited  
479 more often than expected by Mendel (50%), pups were analyzed in generation 28 of fathers  
480 (generation 27) that were heterozygous for this SNP. We only tested markers at which at least 10  
481 heterozygous fathers (or mothers) were available. We counted the number of offspring where a  
482 specific paternal allele was transmitted. When both parents were heterozygous, the allele



483 transmitted cannot be determined and this transmission was not counted in the test statistic.

484 Furthermore, markers were tested for Hardy Weinberg equilibrium (HWE) using the code developed

485 by Wigginton, et al. (Wigginton et al. 2005). Markers not in HWE were excluded, since the  $\chi^2$  test for

486 TRD is only valid when a marker is in HWE. A  $\chi^2$  test was used to test if this distribution of paternally

487 inherited alleles significantly deviated from the expected Mendelian inheritance ratios (**Pat**), and

488 similarly for maternally inherited alleles (**Mat**).

489 • **Pat**: Analysis of allele transmission ratio distortion from heterozygous fathers to offspring

490 
$$\chi^2_{\text{Pat}} = (P_{AB} - P_{BA})^2 / (P_{AB} + P_{BA})$$

491 • **Mat**: Analysis of allele transmission ratio distortion from heterozygous mothers to offspring

492 
$$\chi^2_{\text{Mat}} = (M_{AB} - M_{BA})^2 / (M_{AB} + M_{BA})$$

493  $\chi^2$  scores were transformed into p-values using the appropriate conversions and then transformed

494 into LOD scores using  $-\log_{10}(\text{p-value})$ . 5% and 1% significance thresholds were determined by

495 Bonferroni correction (5%  $\geq 6.75$ , 1%  $\geq 7.45$ ). Significant regions were defined as the region from

496 the first to the last flanking marker above the 1% significance threshold (LOD scores  $\geq 7.45$ ).

#### 497 *Genetic variants in TRD regions*

498 Parental genomes (BFMI860-12 and B6N) were paired-end sequenced using the “Illumina HiSeq”

499 platform (Illumina Inc., San Diego, California, U.S.). Obtained DNA reads were trimmed using

500 trimmomatic (Bolger et al. 2014) after which trimmed reads were aligned to the mouse genome

501 (MM10, [GRCm38.p6](#)) using the Burrows–Wheeler Aligner (BWA) software (Li and Durbin 2009). The

502 subsequent SAM files were converted to BAM files, sorted, and indexed using Samtools (Li et al.

503 2009; Morgan et al. 2017). (Optical) Duplicate reads were removed using Picard tools v2.19.0 (Broad

504 Institute 2016), after which indel realignment and base recalibration was done using the GATK

505 v4.1.0.0 (McKenna et al. 2010), according to GATK best practices (Broad Institute 2018). Sequence

506 variants were called using BCFtools (Morgan et al. 2017) Variants passing quality control were further

507 annotated using the Ensembl Variant Effect Predictor (VEP) (McLaren et al. 2016). DNA sequencing

508 data allowed to identify non-synonymous SNPs (nsSNPs) in genes located in TRD regions between the  
509 founding strains.

510 A permutation strategy was used to detect over- and/or underrepresentation of nsSNPs in the  
511 regions showing TRD. We performed 50,000 permutations, each time drawing 1,424 protein-coding  
512 genes at random, not allowing duplicate genes or selection of predicted genes (GM/RIKEN). For every  
513 permutation, the number of nsSNPs and the number of genes with nsSNPs was recorded. After  
514 50,000 permutations, a distribution of the total number of nsSNPs (and genes) in the random data  
515 was obtained, which was compared with the observed data.

### 516 *Pathway overrepresentation analyses*

517 We extracted all protein-coding genes **inside** the significant regions using **biomaRt (Kasprzyk 2011)**  
518 for each of the different types of allele transmission ratio distortion: Preferred paternal transmission  
519 of the BFMI allele (Pat\_BFMI), preferred paternal transmission of the B6N allele (Pat\_B6N), preferred  
520 maternal transmission of the BFMI allele (Mat\_BFMI), and preferred maternal transmission of the  
521 B6N allele (Mat\_B6N). To identify potential functional clustering of genes within one of these groups,  
522 pathway overrepresentation analyses was performed using innateDB (Breuer et al. 2013) with KEGG  
523 (Ogata et al. 2000) and Reactome (Joshi-Tope et al. 2005) as the pathway providers.  
524 Overrepresentation was tested using a hypergeometric test. P-values reported for pathway  
525 overrepresentation were Benjamini-Hochberg corrected ( $P_{(BH)}$ ) (Benjamini and Hochberg 1995);  $P_{(BH)} <$   
526 0.05 were considered significant. Pathway analysis was additionally performed with genes showing  
527 nsSNPs using the same grouping as before, with “\_SNP” added to the group identifier  
528 (Pat\_BFMI\_SNP, Mat\_BFMI\_SNP, Pat\_B6N\_SNP, and Mat\_B6N\_SNP).

### 529 *Genetic incompatibilities*

530 Testing for pairwise genetic incompatibilities in an exhaustive manner is not advisable because of the  
531 large number of statistical tests required for 20k SNP markers leading to a severe multiple testing  
532 correction. **Our hypothesis is that genetic incompatibilities cause allele transmission ratio distortions.**

533 For testing incompatibilities, 3x3 contingency tables were created using the top SNP marker in the  
534 TRD region 1 (M1) versus the top SNP marker in TRD region 2 (M1), and the number of co-  
535 occurrences between different alleles was counted. If no top marker was present in a region e.g.  
536 Pat\_R5, due to all markers showing a similar distortion, the proximal flanking marker was used as top  
537 marker. Our method for scoring genetic incompatibility is very similar to the methods used by  
538 (Ackermann and Beyer 2012) and (Corbett-Detig et al. 2013). A 3x3 table of expected co-occurrences  
539 based on the observed allele frequencies at markers M1 and M2 was generated assuming  
540 independent segregation of each marker. Resulting  $\chi^2$  scores were transformed into p-values, which  
541 are then transformed to LOD scores as described before. For each pair of markers that showed a  
542 genome-wide significant interaction ( $P_{(BF)} < 0.05$ ), founder alleles of the group which shows the most  
543 reduction (in percentage) between observed and expected co-occurrences was used for the  
544 visualization seen in Figure 2.

545 Pairwise interactions tests were only performed between detected TRD regions, while correction for  
546 multiple testing was done using genome-wide thresholds. This first involved estimating the number  
547 of effective tests by using the simpleM method (Gao 2011). The simpleM method was designed to  
548 estimate the number of independent tests in a GWAS by considering linkage between markers. The  
549 simpleM procedure estimated 1,008 independent test (at a fixLength of 1200) which is much lower  
550 than the number of genetic markers. This reduction in total tests can be explained by strong linkage  
551 between markers in our AIL population. LOD thresholds were adjusted for multiple testing using  
552 Bonferroni correction ( $P_{(BF)}$ ) and the number of independent tests estimated with the simpleM  
553 method ( $n=1,008$ ). Since we tested pairwise but without repeating the test for a pair we have already  
554 tested, the number of tests had to be multiplied with itself and reduced by half leading to LOD scores  
555 calculated as:  $-\log_{10}(\text{threshold} / (1,008 * 1,008 * 0.5))$ . Dependent on the significance threshold, this  
556 leads to the following genome-wide adjusted LOD thresholds: significant if  $\text{LOD} > 7.0$  ( $P_{(BF)} < 0.05$ ) and  
557 highly significant if  $\text{LOD} > 7.7$  ( $P_{(BF)} < 0.01$ ).

558 We then continued our investigation of known protein-protein interactions between genes with non-  
559 synonymous SNPs (nsSNPs) within these regions of incompatibility using the Search Tool for the  
560 Retrieval of Interacting Genes/Proteins (STRING) database **version 11** (Szklarczyk et al. 2019). In total  
561 **9,602,772** known physical protein-protein interactions for *Mus musculus* (SpeciesID 10090) are listed  
562 in this database (**10090.protein.physical.links.v11.0**). **We first only considered the protein-protein**  
563 **interactions between the 128** genes with one or more nsSNP(s). Afterwards, we overlaid the gene  
564 location data with the TRD regions for which we found genome-wide significant evidence of genetic  
565 incompatibilities. This was done to see if identified genetic compatibility could be explained by  
566 known physical protein-protein interactions in which both participating genes show one or more  
567 nsSNP(s).

## 568 *List of abbreviations*

569 AIL - Advanced intercross line  
570 BFMI - Berlin Fat Mouse inbred line  
571 B6N - C57BL/6N inbred line  
572 Mat - Maternal transmission ratio distortion  
573 **MAF – Minor allele frequency**  
574 nsSNP - Non-Synonymous Single Nucleotide Polymorphism  
575  $P_{(BF)}$  - Bonferroni corrected p-value  
576  $P_{(BH)}$  - Benjamini–Hochberg corrected p-value  
577 Pat - Paternal transmission ratio distortion  
578 QTL - Quantitative trait locus  
579 SNP - Single nucleotide polymorphism  
580 TRD - Transmission ratio distortion

581 ***Declarations***

582 ***Ethics approval***

583 All experimental treatments of animals were approved by the German Animal Welfare Authorities  
584 (approval no. G0016/11).

585 ***Availability of data and materials***

586 The datasets supporting the conclusions of this article are included within the article and its  
587 supplementary files. DNA sequencing data was deposited at the NCBI Sequence Read Archive (SRA)  
588 under BioProject ID: PRJNA717237

589 ***Conflict of Interest***

590 The authors declare no conflict of interest.

591 ***Funding***

592 The project was funded by the Deutsche Forschungsgemeinschaft (DFG) (BR 1285/12-2).

## 593 *Authors' contributions*

594 **D.A.** contributed to the design of the experiment, performed the data analysis and drafted the  
595 manuscript. **S. K.** was involved in the design of the experiment, animal handling, sample collection,  
596 and contributed to the manuscript. **S.H.** was responsible for animal handling, sample collection and  
597 DNA extraction. **P.K.** contributed to critical data analysis discussions, revision of the manuscript and  
598 Table 1, and Figure 2. **D.H.** contributed to writing and critical revision of the manuscript, and  
599 discussion about the biological implications of the observed TRD. **G.A.B.** designed the experiment,  
600 planned, organized and supervised the project; contributed to write and critically revise the  
601 manuscript.

## 602 *Authors' information*

603 Dr. Danny Arends finished his PhD at the Groningen Bioinformatics Centre at the University of  
604 Groningen in November 2014 and is currently working as a PostDoc at the Humboldt University in  
605 Berlin. He develops new computational methodologies and open source software for use in (systems)  
606 biology research, such as the addition of Multiple QTL Mapping (MQM) into R/qtl. His focus is  
607 development of large-scale computational methods in QTL analysis, and the integration of 'big data'  
608 biological data sets in a comprehensive manner.

609 Dr. Sebastian Heise finished his PhD in the group Breeding Biology and molecular Genetics at  
610 Humboldt-University in Berlin in November 2014. He is working with lean and obese mouse models  
611 on projects focusing on insulin sensitivity and type-2 diabetes. Exploring the genetics contribution  
612 beyond the complex traits is the key interest of his projects.

613 Dr. Stefan Kärst finished his PhD in the group Breeding Biology and molecular Genetics at Humboldt-  
614 University in Berlin in October 2011 and is currently working at a Biotech company in Berlin. During  
615 his PhD and PostDoc at the Humboldt University in Berlin, Stefan developed new methods for  
616 phenotyping, mapped muscle trait QTLs and analyzed NGS data for gene expression and sequence  
617 variants.

618 Dr. Paula Korkuc obtained her Bioinformatics Ph.D. degree from the University of Potsdam in  
619 cooperation with the Max-Planck institute for Molecular Plant Physiology in 2016. She is currently  
620 working as a PostDoc at the Humboldt University in Berlin. Her current research focusses on the  
621 identification of functional variants associated with milk production traits in the endangered German  
622 DSN cattle breed using DNA sequencing, SNP-chip data, and novel computational methods  
623 implemented in R.

624 Dr. Deike Hesse studied biology at the universities of Düsseldorf, Nantes and Marburg. She obtained  
625 her doctor degree from the University of Potsdam in collaboration with the German Institute for  
626 Human Nutrition in 2010. Since 2017 she works as a researcher and lecturer at the Humboldt  
627 University in Berlin. Her research focusses on energy metabolism, body weight development, and  
628 diabetes. Using mouse models with different genetic backgrounds she aims to elucidate the  
629 contribution and interaction of different tissues and metabolic pathways to metabolic phenotypes.

630 Prof. Dr. Gudrun A. Brockmann studied Biophysics in Berlin, finished her PhD in Embryology at the  
631 Academy of Agricultural Sciences, and obtained her Habilitation in the field of Genetics at Rostock  
632 University, Germany. She had worked with mice as models for animal breeding at the Leibnitz-  
633 Institute for Farm Animals in Dummerstorf, before she was appointed as a Full Professor for Animal  
634 Breeding and Molecular Genetics at Humboldt-University Berlin in 2003. Her interest is the  
635 understanding of genetics underlying complex traits with a focus on energy partitioning. She is  
636 author of more than 130 papers, acts on scientific advisory boards, and as reviewer for all kind of  
637 research applications.

## 638 *References*

- 639 Ackermann M, Beyer A. 2012. Systematic Detection of Epistatic Interactions Based on Allele Pair  
640 Frequencies ed. J. Flint. *PLoS Genet* **8**: e1002463.  
641 <https://dx.plos.org/10.1371/journal.pgen.1002463>.
- 642 Arends D, Heise S, Kärst S, Trost J, Brockmann GA. 2016. Fine mapping a major obesity locus (jObes1)  
643 using a Berlin Fat Mouse × B6N advanced intercross population. *Int J Obes* **40**: 1784–1788.  
644 <http://www.nature.com/articles/ijo2016150>.
- 645 Benjamini Y, Hochberg Y. 1995. Controlling the False Discovery Rate: A Practical and Powerful  
646 Approach to Multiple Testing. *J R Stat Soc Ser B* **57**: 289–300.  
647 <http://www.jstor.org/stable/pdfplus/2346101.pdf?acceptTC=true>.
- 648 Blake JA, Baldarelli R, Kadin JA, Richardson JE, Smith CL, Bult CJ, Anagnostopoulos A V, Beal JS, Bello  
649 SM, Blodgett O, et al. 2021. Mouse Genome Database (MGD): Knowledgebase for mouse–  
650 human comparative biology. *Nucleic Acids Res* **49**: D981–D987.  
651 <https://academic.oup.com/nar/article/49/D1/D981/5999894>.
- 652 Bolger AM, Lohse M, Usadel B. 2014. Trimmomatic: a flexible trimmer for Illumina sequence data.  
653 *Bioinformatics* **30**: 2114–2120.  
654 <http://bioinformatics.oxfordjournals.org/content/30/15/2114%5Cnhttp://bioinformatics.oxford>  
655 [journals.org/content/30/15/2114.abstract.html?etoc%5Cnhttp://bioinformatics.oxfordjournals.](http://bioinformatics.oxfordjournals.org/content/30/15/2114.abstract.html?etoc%5Cnhttp://bioinformatics.oxfordjournals.org/content/30/15/2114.full.pdf%5Cnhttp://www.ncbi.nlm.nih.gov/pubmed/24695404)  
656 [org/content/30/15/2114.full.pdf%5Cnhttp://www.ncbi.nlm.nih.gov/pubmed/24695404](http://www.ncbi.nlm.nih.gov/pubmed/24695404)  
657 (Accessed July 9, 2014).
- 658 Brand CL, Larracuenta AM, Presgraves DC. 2015. Origin, evolution, and population genetics of the  
659 selfish Segregation Distorter gene duplication in European and African populations of  
660 *Drosophila melanogaster*. *Evolution (N Y)*.
- 661 Breuer K, Ferooshani AK, Laird MR, Chen C, Sribnaia A, Lo R, Winsor GL, Hancock REW, Brinkman FSL,  
662 Lynn DJ. 2013. InnateDB: Systems biology of innate immunity and beyond - Recent updates and



- 663 continuing curation. *Nucleic Acids Res* **41**.
- 664 Broad Institute. 2018. GATK Best Practices. <https://software.broadinstitute.org/gatk/best-practices/>  
665 (Accessed February 1, 2018).
- 666 Broad Institute. 2016. Picard tools. <https://broadinstitute.github.io/picard/>.
- 667 Brockmann C., Brockmann T., Dege S., Skosyrski S., Strauß O, Jousen A. M. 2017. SaF08-04 -  
668 Hereditäre Retinale Degeneration der Berliner Fettmaus. In *Abstractband DOG*, p. 201  
669 [https://www.dog.org/wp-content/uploads/2017/08/Abstractband\\_DOG\\_2017.pdf](https://www.dog.org/wp-content/uploads/2017/08/Abstractband_DOG_2017.pdf).
- 670 Browning SR, Browning BL. 2007. Rapid and accurate haplotype phasing and missing-data inference  
671 for whole-genome association studies by use of localized haplotype clustering. *Am J Hum Genet*  
672 **81**: 1084–1097.
- 673 Brunet S, Verlhac MH. 2011. Positioning to get out of meiosis: The asymmetry of division. *Hum*  
674 *Reprod Update*.
- 675 Buniello A, MacArthur JAL, Cerezo M, Harris LW, Hayhurst J, Malangone C, McMahon A, Morales J,  
676 Mountjoy E, Sollis E, et al. 2019. The NHGRI-EBI GWAS Catalog of published genome-wide  
677 association studies, targeted arrays and summary statistics 2019. *Nucleic Acids Res* **47**: D1005–  
678 D1012. <https://academic.oup.com/nar/article/47/D1/D1005/5184712>.
- 679 Camacho C, Coulouris G, Avagyan V, Ma N, Papadopoulos J, Bealer K, Madden TL. 2009. BLAST+:  
680 architecture and applications. *BMC Bioinformatics* **10**: 421.
- 681 Chmátal L, Gabriel SI, Mitsainas GP, Martínez-Vargas J, Ventura J, Searle JB, Schultz RM, Lampson  
682 MA. 2014. Centromere strength provides the cell biological basis for meiotic drive and  
683 karyotype evolution in mice. *Curr Biol*.
- 684 Clark GW, Dar V-N, Bezginov A, Yang JM, Charlebois RL, Tillier ERM. 2011. Using Coevolution to  
685 Predict Protein–Protein Interactions. pp. 237–256 [http://link.springer.com/10.1007/978-1-61779-276-2\\_11](http://link.springer.com/10.1007/978-1-61779-276-2_11).  
686

- 687 Comuzzie AG, Cole SA, Laston SL, Voruganti VS, Haack K, Gibbs RA, Butte NF. 2012. Novel Genetic  
688 Loci Identified for the Pathophysiology of Childhood Obesity in the Hispanic Population. *PLoS*  
689 *One*.
- 690 Corbett-Detig RB, Zhou J, Clark AG, Hartl DL, Ayroles JF. 2013. Genetic incompatibilities are  
691 widespread within species. *Nature* **504**: 135–7.  
692 <http://www.ncbi.nlm.nih.gov/pubmed/24196712>.
- 693 DeBosch BJ, Kluth O, Fujiwara H, Schürmann A, Moley K. 2014. Early-onset metabolic syndrome in  
694 mice lacking the intestinal uric acid transporter SLC2A9. *Nat Commun* **5**: 4642.  
695 <http://www.nature.com/articles/ncomms5642>.
- 696 Dinour D, Gray NK, Campbell S, Shu X, Sawyer L, Richardson W, Rechavi G, Amariglio N, Ganon L, Sela  
697 BA, et al. 2010. Homozygous SLC2A9 mutations cause severe renal hypouricemia. *J Am Soc*  
698 *Nephrol*.
- 699 Duriez B, Duquesnoy P, Escudier E, Bridoux AM, Escalier D, Rayet I, Marcos E, Vojtek AM, Bercher JF,  
700 Amselem S. 2007. A common variant in combination with a nonsense mutation in a member of  
701 the thioredoxin family causes primary ciliary dyskinesia. *Proc Natl Acad Sci U S A*.
- 702 Fel-Clair F, Catalan J, Lenormand T, Britton-Davidian J. 1998. Centromeric Incompatibilities in the  
703 Hybrid Zone Between House Mouse Subspecies from Denmark: Evidence from Patterns of Nor  
704 Activity. *Evolution (N Y)* **52**: 592–603.
- 705 Fischer E, Charbonneau H, Tonks N. 1991. Protein tyrosine phosphatases: a diverse family of  
706 intracellular and transmembrane enzymes. *Science (80- )* **253**: 401–406.  
707 <https://www.sciencemag.org/lookup/doi/10.1126/science.1650499>.
- 708 Fitzpatrick JL, Evans JP. 2009. Reduced heterozygosity impairs sperm quality in endangered  
709 mammals. *Biol Lett* **5**: 320–323. <https://royalsocietypublishing.org/doi/10.1098/rsbl.2008.0734>.
- 710 Flurkey K, Curren JM, Leiter EH, Witham B, Jackson Laboratory (Bar Harbor M. 2009. *The Jackson*

- 711 *Laboratory Handbook on Genetically Standardized Mice*. 6th ed. eds. K. Flurkey, J.M. Curren,  
712 E.H. Leiter, and B. Witham. The Jackson Laboratory, Bar Harbor, ME 04609 USA  
713 [https://www.urmc.rochester.edu/MediaLibraries/URMCMedia/animal-](https://www.urmc.rochester.edu/MediaLibraries/URMCMedia/animal-resource/forms/documents/JAX-Handbook-Genetically-Standardized-Mice.pdf)  
714 [resource/forms/documents/JAX-Handbook-Genetically-Standardized-Mice.pdf](https://www.urmc.rochester.edu/MediaLibraries/URMCMedia/animal-resource/forms/documents/JAX-Handbook-Genetically-Standardized-Mice.pdf).
- 715 Gao X. 2011. Multiple testing corrections for imputed SNPs. *Genet Epidemiol* **35**: 154–158.
- 716 GeneCards Human Gene Database. 2021. STK32B Gene - GeneCards. [https://www.genecards.org/cgi-](https://www.genecards.org/cgi-bin/carddisp.pl?gene=STK32B)  
717 [bin/carddisp.pl?gene=STK32B](https://www.genecards.org/cgi-bin/carddisp.pl?gene=STK32B).
- 718 Heid IM, Jackson AU, Randall JC, Winkler TW, Qi L, Steinhorsdottir V, Thorleifsson G, Zillikens MC,  
719 Speliotes EK, Mägi R, et al. 2010. Meta-analysis identifies 13 new loci associated with waist-hip  
720 ratio and reveals sexual dimorphism in the genetic basis of fat distribution. *Nat Genet* **42**: 949–  
721 960. <https://www.nature.com/articles/ng.686.pdf>.
- 722 Heinonen S, Buzkova J, Muniandy M, Kaksonen R, Ollikainen M, Ismail K, Hakkarainen A, Lundbom J,  
723 Lundbom N, Vuolteenaho K, et al. 2015. Impaired mitochondrial biogenesis in adipose tissue in  
724 acquired obesity. *Diabetes*.
- 725 Hirsch CN, Flint-Garcia SA, Beissinger TM, Eichten SR, Deshpande S, Barry K, McMullen MD, Holland  
726 JB, Buckler ES, Springer N, et al. 2014. Insights into the Effects of Long-Term Artificial Selection  
727 on Seed Size in Maize. *Genetics* **198**: 409–421.  
728 <https://academic.oup.com/genetics/article/198/1/409-421/6073421>.
- 729 Huang LO, Labbe A, Infante-Rivard C. 2013a. Transmission ratio distortion: review of concept and  
730 implications for genetic association studies. *Hum Genet* **132**: 245–63.  
731 <http://www.ncbi.nlm.nih.gov/pubmed/23242375>.
- 732 Huang X, Baumann M, Nikitina L, Wenger F, Surbek D, Körner M, Albrecht C. 2013b. RNA degradation  
733 differentially affects quantitative mRNA measurements of endogenous reference genes in  
734 human placenta. *Placenta* **34**: 544–7. <http://www.ncbi.nlm.nih.gov/pubmed/23623484>  
735 (Accessed October 11, 2013).

- 736 Joshi-Tope G, Gillespie M, Vastrik I, D'Eustachio P, Schmidt E, de Bono B, Jassal B, Gopinath GR, Wu  
737 GR, Matthews L, et al. 2005. Reactome: a knowledgebase of biological pathways. *Nucleic Acids*  
738 *Res* **33**: D428-32. <http://www.ncbi.nlm.nih.gov/pubmed/15608231>.
- 739 Kasprzyk A. 2011. BioMart: driving a paradigm change in biological data management. *Database*  
740 *(Oxford)* **2011**: bar049.  
741 <http://www.pubmedcentral.nih.gov/articlerender.fcgi?artid=3215098&tool=pmcentrez&render>  
742 [type=abstract](http://www.pubmedcentral.nih.gov/articlerender.fcgi?artid=3215098&tool=pmcentrez&render) (Accessed July 12, 2014).
- 743 Klink BU, Gatsogiannis C, Hofnagel O, Wittinghofer A, Raunser S. 2020. Structure of the human  
744 BBSome core complex. *Elife* **9**. <https://elifesciences.org/articles/53910>.
- 745 Kopelman P. 2007. Health risks associated with overweight and obesity. *Obes Rev* **8**: 13–17.  
746 <http://doi.wiley.com/10.1111/j.1467-789X.2007.00311.x>.
- 747 Kursel LE, Malik HS. 2018. The cellular mechanisms and consequences of centromere drive. *Curr Opin*  
748 *Cell Biol*.
- 749 Lanneluc I, Desmarais E, Boursot P, Dod B, Bonhomme F. 2004. Characterization of a centromeric  
750 marker on mouse Chromosome 11 and its introgression in a domesticus/musculus hybrid zone.  
751 *Mamm Genome*.
- 752 Larson EL, Vanderpool D, Sarver BAJ, Callahan C, Keeble S, Provencio LL, Kessler MD, Stewart V,  
753 Nordquist E, Dean MD, et al. 2018. The evolution of polymorphic hybrid incompatibilities in  
754 house mice. *Genetics*.
- 755 Lenormand T, Fel-Clair F, Manolakou K, Alibert P, Britton-Davidian J. 1997. Chromosomal  
756 transmission bias in laboratory hybrids between wild strains of the two European subspecies of  
757 house mice. *Genetics*.
- 758 Li G, Jin J, Zhou Y, Bai X, Mao D, Tan C, Wang G, Ouyang Y. 2019. Genome-wide dissection of  
759 segregation distortion using multiple inter-subspecific crosses in rice. *Sci China Life Sci* **62**: 507–

- 760 516. <http://link.springer.com/10.1007/s11427-018-9452-8>.
- 761 Li H, Durbin R. 2009. Fast and accurate short read alignment with Burrows-Wheeler transform.  
762 *Bioinformatics* **25**: 1754–60. <https://www.ncbi.nlm.nih.gov/pmc/articles/PMC2705234/>  
763 (Accessed July 9, 2014).
- 764 Li H, Handsaker B, Wysoker A, Fennell T, Ruan J, Homer N, Marth G, Abecasis GR, Durbin R. 2009. The  
765 Sequence Alignment/Map format and SAMtools. *Bioinformatics* **25**: 2078–2079.  
766 <https://academic.oup.com/bioinformatics/article-lookup/doi/10.1093/bioinformatics/btp352>.
- 767 Locke AE, Kahali B, Berndt SI, Justice AE, Pers TH, Day FR, Powell C, Vedantam S, Buchkovich ML, Yang  
768 J, et al. 2015. Genetic studies of body mass index yield new insights for obesity biology. *Nature*  
769 **518**: 197–206. <http://dx.doi.org/10.1038/nature14177>.
- 770 Lu M, Varley AW, Ohta S, Hardwick J, Munford RS. 2008. Host Inactivation of Bacterial  
771 Lipopolysaccharide Prevents Prolonged Tolerance Following Gram-Negative Bacterial Infection.  
772 *Cell Host Microbe* **4**: 293–302.  
773 <https://linkinghub.elsevier.com/retrieve/pii/S1931312808002242>.
- 774 Lyon MF. 2003. Transmission ratio distortion in mice. *Annu Rev Genet* **37**: 393–408.  
775 <http://www.ncbi.nlm.nih.gov/pubmed/14616067>.
- 776 Martin-DeLeon PA, Zhang H, Morales CR, Zhao Y, Rulon M, Barnoski BL, Chen H, Galileo DS. 2005.  
777 Spam I-associated transmission ratio distortion in mice: Elucidating the mechanism. *Reprod Biol*  
778 *Endocrinol*.
- 779 Matsuo H, Chiba T, Nagamori S, Nakayama A, Domoto H, Phetdee K, Wiriyasermkul P, Kikuchi Y, Oda  
780 T, Nishiyama J, et al. 2008. Mutations in Glucose Transporter 9 Gene SLC2A9 Cause Renal  
781 Hypouricemia. *Am J Hum Genet*.
- 782 McKenna A, Hanna M, Banks E, Sivachenko AY, Cibulskis K, Kernytsky AM, Garimella K, Altshuler D,  
783 Gabriel S, Daly MJ, et al. 2010. The Genome Analysis Toolkit: A MapReduce framework for

- 784 analyzing next-generation DNA sequencing data. *Genome Res* **20**: 1297–1303.
- 785 <http://genome.cshlp.org/cgi/doi/10.1101/gr.107524.110> (Accessed July 9, 2014).
- 786 McLaren W, Gil L, Hunt SE, Riat HS, Ritchie GRS, Thormann A, Flicek P, Cunningham F. 2016. The
- 787 Ensembl Variant Effect Predictor. *Genome Biol* **17**: 1–14.
- 788 Morgan AP, Welsh CE. 2015. Informatics resources for the Collaborative Cross and related mouse
- 789 populations. *Mamm Genome*.
- 790 Morgan M, Pagès H, Obenchain V, N H. 2017. Rsamtools: Binary alignment (BAM), FASTA, variant call
- 791 (BCF), and tabix file import. *R Packag version 1300*.
- 792 <http://bioconductor.org/packages/release/bioc/html/Rsamtools.html> (Accessed February 15,
- 793 2018).
- 794 Mouse Genome Database (MGD). 2021. Myo5c - MGI Mouse Gene Detail.
- 795 <http://www.informatics.jax.org/marker/MGI:2442485> (Accessed September 3, 2021).
- 796 Neuschl C, Hantschel C, Wagener A, Schmitt AO, Illig T, Brockmann GA. 2010. A unique genetic defect
- 797 on chromosome 3 is responsible for juvenile obesity in the Berlin Fat Mouse. *Int J Obes* **34**:
- 798 1706–1714. <https://www.nature.com/articles/ijo201097>.
- 799 Ogata H, Goto S, Sato K, Fujibuchi W, Bono H, Kanehisa M, Goto S. 2000. KEGG: kyoto encyclopedia
- 800 of genes and genomes. *Nucleic Acids Res* **28**: 29–34.
- 801 <https://www.ncbi.nlm.nih.gov/pmc/articles/PMC102409/>.
- 802 Ojogun NI. 2008. CONSTITUTIVE OVEREXPRESSION OF ACYLOXYACYL HYDROLASE IN MUS
- 803 MUSCULUS. The University of Texas Southwestern Medical Center at Dallas [https://utswmed-](https://utswmed-ir.tdl.org/bitstream/handle/2152.5/383/OjogunNoredia.pdf)
- 804 [ir.tdl.org/bitstream/handle/2152.5/383/OjogunNoredia.pdf](https://utswmed-ir.tdl.org/bitstream/handle/2152.5/383/OjogunNoredia.pdf).
- 805 PAPES F, KEMPER EL, CORD-NETO G, LANGONE F, ARRUDA P. 1999. Lysine degradation through the
- 806 saccharopine pathway in mammals: involvement of both bifunctional and monofunctional
- 807 lysine-degrading enzymes in mouse. *Biochem J*.

- 808 Paterson AD, Waggott D, Schillert A, Infante-Rivard C, Bull SB, Yoo YJ, Pinnaduwa D. 2009.  
809 Transmission-ratio distortion in the Framingham Heart Study. *BMC Proc* **3**: S51.  
810 <https://bmcpoc.biomedcentral.com/articles/10.1186/1753-6561-3-S7-S51>.
- 811 Rodríguez-Carrizalez AD, Castellanos-González JA, Martínez-Romero EC, Miller-Arrebillaga G, Villa-  
812 Hernández D, Hernández-Godínez PP, Ortiz GG, Pacheco-Moisés FP, Cardona-Muñoz EG,  
813 Miranda-Díaz AG. 2014. Oxidants, antioxidants and mitochondrial function in non-proliferative  
814 diabetic retinopathy. *J Diabetes*.
- 815 Rodriguez OC, Cheney RE. 2002. Human myosin-Vc is a novel class V myosin expressed in epithelial  
816 cells. *J Cell Sci*.
- 817 Sacksteder KA, Biery BJ, Morrell JC, Goodman BK, Geisbrecht B V., Cox RP, Gould SJ, Geraghty MT.  
818 2000. Identification of the  $\alpha$ -amino adipic semialdehyde synthase which is defective in familial  
819 hyperlysinemia. *Am J Hum Genet*.
- 820 Safronova LD, Chubykin VL. 2013. Meiotic drive in mice carrying t-complex in their genome. *Russ J*  
821 *Genet*.
- 822 Schmitt AO, Bortfeldt RH, Neuschl C, Brockmann GA. 2009. RandoMate: A program for the  
823 generation of random mating schemes for small laboratory animals. *Mamm Genome* **20**: 321–  
824 325.
- 825 Shungin D, Winkler TW, Croteau-Chonka DC, Ferreira T, Locke AE, Mägi R, Strawbridge RJ, Pers TH,  
826 Fischer K, Justice AE, et al. 2015. New genetic loci link adipose and insulin biology to body fat  
827 distribution. *Nature* **518**: 187–96. <http://dx.doi.org/10.1038/nature14132>.
- 828 Singhai M, Goyal R, Faizy A. 2011. Glutathione peroxidase activity in obese and nonobese diabetic  
829 patients and role of hyperglycemia in oxidative stress. *J Midlife Health*.
- 830 Speliotes EK, Willer CJ, Berndt SI, Monda KL, Thorleifsson G, Jackson AU, Allen HL, Lindgren CM, Luan  
831 J, Mägi R, et al. 2010. Association analyses of 249,796 individuals reveal 18 new loci associated

- 832 with body mass index. *Nat Genet* **42**: 937–948. <https://www.nature.com/articles/ng.686.pdf>.
- 833 Szklarczyk D, Gable AL, Lyon D, Junge A, Wyder S, Huerta-Cepas J, Simonovic M, Doncheva NT, Morris  
834 JH, Bork P, et al. 2019. STRING v11: Protein-protein association networks with increased  
835 coverage, supporting functional discovery in genome-wide experimental datasets. *Nucleic Acids*  
836 *Res*.
- 837 Teeter KC, Payseur BA, Harris LW, Bakewell MA, Thibodeau LM, O'Brien JE, Krenz JG, Sans-Fuentes  
838 MA, Nachman MW, Tucker PK. 2008. Genome-wide patterns of gene flow across a house  
839 mouse hybrid zone. *Genome Res* **18**: 67–76.
- 840 Temtamy SA, Aglan MS, Valencia M, Cocchi G, Pacheco M, Ashour AM, Amr KS, Helmy SMH, El-  
841 Gammal MA, Wright M, et al. 2008. Long interspersed nuclear element-1 (LINE1)-mediated  
842 deletion of EVC, EVC2, C4orf6, and STK32B in ellis-van Creveld syndrome with borderline  
843 intelligence. *Hum Mutat*.
- 844 Teppa E, Zea DJ, Marino-Buslje C. 2017. Protein–protein interactions leave evolutionary footprints:  
845 High molecular coevolution at the core of interfaces. *Protein Sci*.
- 846 Tremmel M, Gerdtham U-G, Nilsson P, Saha S. 2017. Economic Burden of Obesity: A Systematic  
847 Literature Review. *Int J Environ Res Public Health* **14**: 435. [http://www.mdpi.com/1660-](http://www.mdpi.com/1660-4601/14/4/435)  
848 [4601/14/4/435](http://www.mdpi.com/1660-4601/14/4/435).
- 849 Wagener A, Schmitt AO, Aksu S, Schlote W, Neuschl C, Brockmann GA. 2006. Genetic, sex, and diet  
850 effects on body weight and obesity in the Berlin Fat Mouse Inbred lines. *Physiol Genomics* **27**:  
851 264–270.
- 852 Weinberg CR, Wilcox AJ, Lie RT. 1998. A log-linear approach to case-parent-triad data: assessing  
853 effects of disease genes that act either directly or through maternal effects and that may be  
854 subject to parental imprinting. *Am J Hum Genet* **62**: 969–978.
- 855 Whitlock MC. 2000. Fixation Of New Alleles And The Extinction Of Small Populations: Drift Load,



- 856 Beneficial Alleles, And Sexual Selection. *Evolution (N Y)* **54**: 1855–1861.  
857 <http://doi.wiley.com/10.1111/j.0014-3820.2000.tb01232.x>.
- 858 Wigginton JE, Cutler DJ, Abecasis GR. 2005. A Note on Exact Tests of Hardy-Weinberg Equilibrium.  
859 *Am J Hum Genet* **76**: 887–893.  
860 <https://linkinghub.elsevier.com/retrieve/pii/S0002929707607356>.
- 861 Willer CJ, Speliotes EK, Loos RJF, Li S, Lindgren CM, Heid IM, Berndt SI, Elliott AL, Jackson AU, Lamina  
862 C, et al. 2009. Six new loci associated with body mass index highlight a neuronal influence on  
863 body weight regulation. *Nat Genet* **41**: 25–34.  
864 <http://www.nature.com/doi/10.1038/ng.287>.
- 865 Xie Y, Tang J, Xie X, Li X, Huang J, Fei Y, Han J, Chen S, Tang H, Zhao X, et al. 2019. An asymmetric  
866 allelic interaction drives allele transmission bias in interspecific rice hybrids. *Nat Commun*.
- 867 Zajitschek SRK, Lindholm AK, Evans JP, Brooks RC. 2009. Experimental evidence that high levels of  
868 inbreeding depress sperm competitiveness. *J Evol Biol* **22**: 1338–45.  
869 <http://doi.wiley.com/10.1111/j.1420-9101.2009.01738.x>.
- 870 Zuk O, Hechter E, Sunyaev SR, Lander ES. 2012. The mystery of missing heritability: Genetic  
871 interactions create phantom heritability. *Proc Natl Acad Sci* **109**: 1193–1198.  
872 <http://www.pnas.org/cgi/doi/10.1073/pnas.1119675109>.
- 873

874 ***Supplemental files***

875 Supplemental\_Table\_S1 - ***Transmission ratio distortion, allele transmissions, and p-values***

876 Supplemental\_Table\_S2 – ***Genotypes, map, and pedigree of the AIL individuals***

877 Supplemental\_Table\_S3 - ***Genes in TRD regions (All, Non-synonymous SNPs)***

878 Supplemental\_Table\_S4 - ***Complete pathway over-representation analysis***

879 Supplemental\_File\_S5 - ***MAF comparison and marker density***
